# Supplementary material
Source: PubMed Central journal article supplement (PMC2827246)
Supplement: NIHMS160816-supplement-Supplimental_material.pdf [file NIHMS160816-supplement-Supplimental_material.pdf]

**Title.**

"Accelerated photobleaching of a cyanine dye in the presence of a ternary target DNA, PNA probe, dye catalytic complex; a novel molecular diagnostic"

**Authors.**

M. Wang<sup>1</sup>, R. Holmes-Davis<sup>1</sup>, Z. Rafinski<sup>2</sup>, B. Jedrzejewska<sup>2</sup>, K. Y. Choi<sup>4</sup>, M. Zwick<sup>4</sup>, C. Bupp<sup>4</sup>, A. Izmailov<sup>3</sup>, J. Paczkowski<sup>2</sup>, B. Warner<sup>1</sup>, H. Koshinsky<sup>1\*</sup>

**Affiliations**

1. Investigen Inc., Hercules, CA
2. Faculty of Chemical Technology & Engineering, University of Technology and Life Sciences, Bydgoszcz, Poland
3. Advanced Scientific Consulting, Etobicoke, Ontario, Canada
4. Previously at Investigen

**Corresponding Author\***

510-964-9700, ceo@investigen.com

**Table of contents in SI**

**S1.** PNA names and sequences

**S2.** Fluorescence emission spectra

**S3.** Detection of MTB DNA in the presence of non-specific DNA

**S4.** <sup>1</sup>H NMR spectra of photodecomposition product # **I**.

**S5.** Effects of oxygen presence on the absorbance maxima of DiSC<sub>2</sub>(3)

**S6.** Effects of sodium azide on a smartDNA assay

|   |                  | PNA sequence       | DNA sequence      |
|---|------------------|--------------------|-------------------|
| 1 | TB14(gel lane 1) | GTCGTCAGACCCAAAAC  | GTTTTGGGTCTGACGAC |
| 2 | TB19(gel lane 2) | TGAACCGCCCCGGCATG  | CATGCCGGGGCGGTTCA |
| 3 | TB15(gel lane 3) | ACCAAGTAGACGGGCGA  | TCGCCCGTCTACTTGGT |
| 4 | TB20(gel lane 4) | CATCCAACCGTCGGTCCG | CGACCGACGGTTGGATG |
| 5 | TB23             | GTTTTGGGTCTGACGAC  | GTCGTCAGACCCAAAAC |

**S1.** PNA names and sequences. All PNAs have a C-terminal carboxamide. The modification on the N-terminal is Lysine.

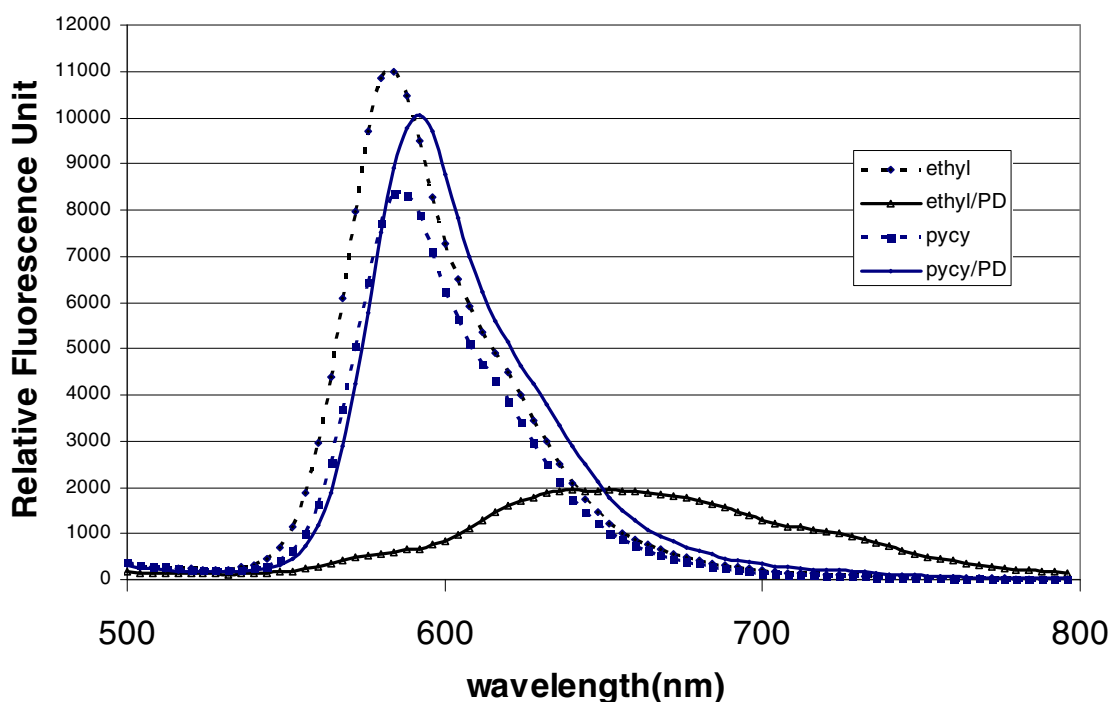

**S2.** Fluorescence emission spectra of 2.25  $\mu\text{M}$  DiSC<sub>2</sub>(3) or DiSC<sub>py</sub>(3), alone or with 0.25  $\mu\text{M}$  PNA-DNA duplex. PNA TB23 was used, the reactions were in 10mM Homopipes buffer, pH 5 and 470nm was the excitation wavelength.

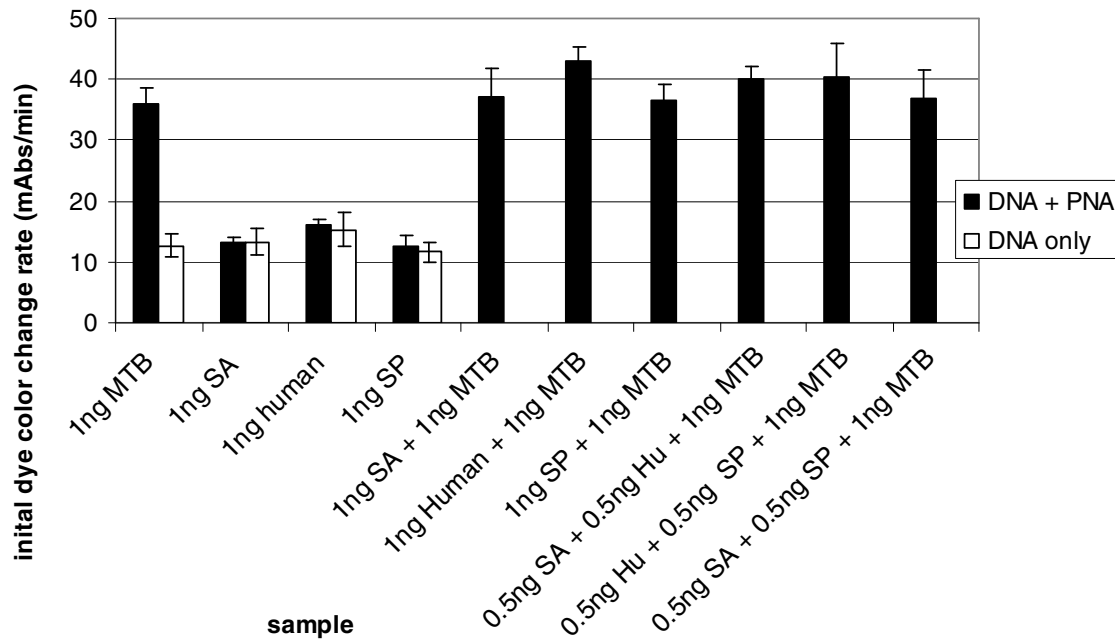

S3 Detection of MTB DNA in the presence of non-specific DNA. The initial (first 4 minutes) photobleaching rate of smartDNA reactions with *M. tuberculosis* (MTB) DNA alone, non-*M. tuberculosis* species DNA alone, and mixtures of DNA in the presence and absence of *M. tuberculosis* specific PNA probe, TB19. Reaction conditions are 10mM Homopipes buffer, pH5.0, with 0.05% Tween-80, the final concentration of PNA in the 50 $\mu$ l reaction is 160nM. SP is *Streptococcus pneumoniae* DNA. SA is *Staphylococcus aureus* DNA. Hu is Human DNA.

h5322  
I  
Z. Rafinski  
2H

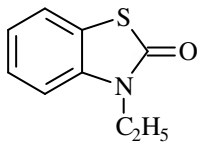

Pulse Sequence: s2pul  
Solvent: CDCl3  
Ambient temperature  
File: h5322  
GEMINI-200MHz "nmr"

Relax. delay 2.000 sec  
Pulse 44.6 degrees  
Acq. time 4.000 sec  
Width 4500.0 Hz  
S repetitions  
OBSERVE M1 199.9795466 MHz  
DATA PROCESSING  
Resol. enhancement -0.0 Hz  
PT size 65536  
Total time 0 min, 50 sec

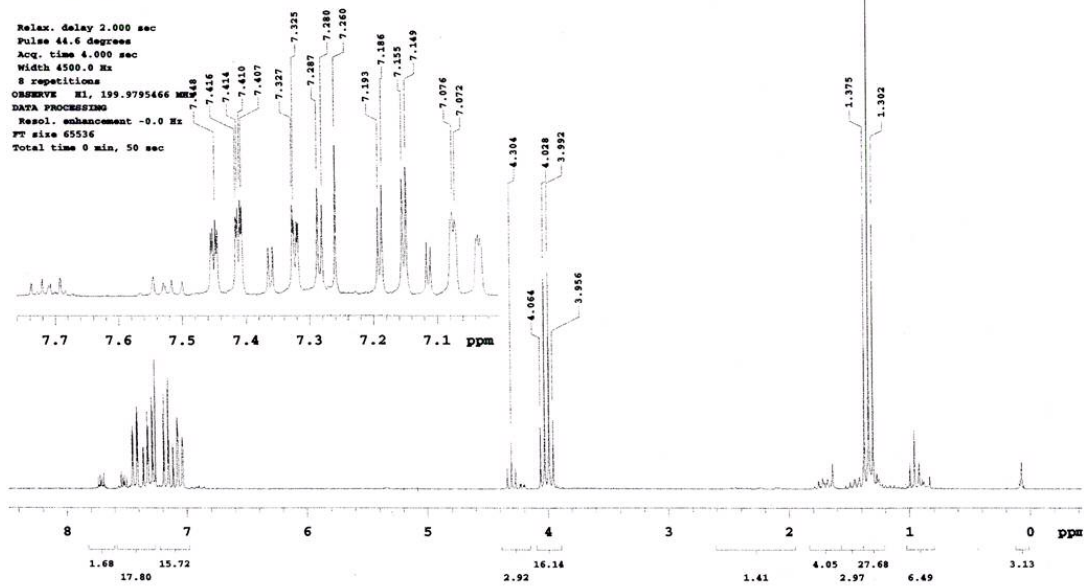

S4. <sup>1</sup>H NMR spectra of photodecomposition product # I.

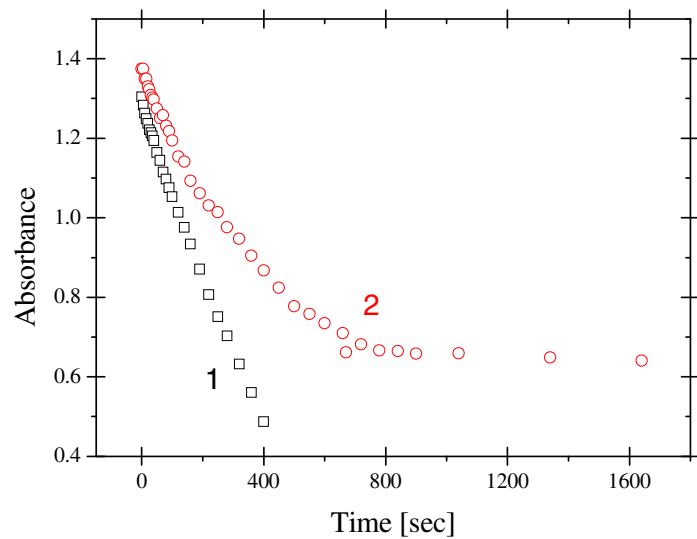

**S5.** Effects of oxygen presence on the absorbance maxima of  $\text{DiSC}_2(3)$ . The changes of the absorption intensity at  $\lambda_{\text{max}}$  during irradiation of  $\text{DiSC}_2(3)$  in phosphate buffer solution in: **1** oxygen saturated solution and **2** in argon saturated solution. Time of argon bubbling was 100 minutes.

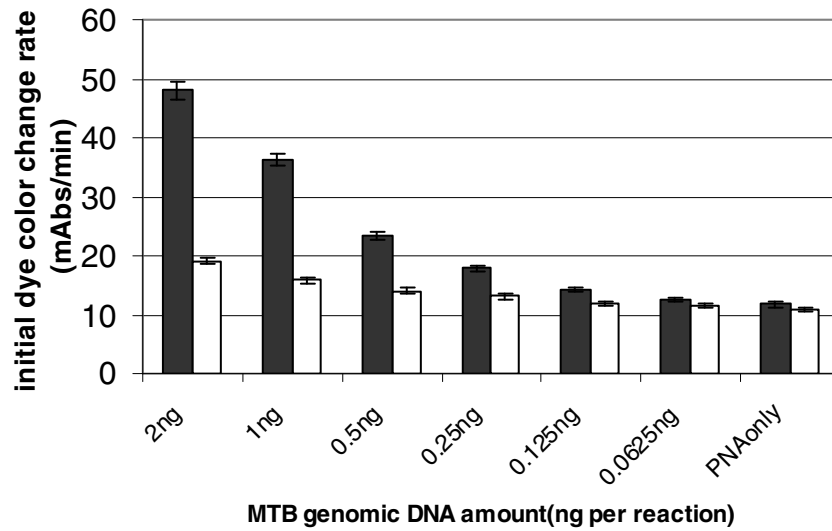

**S6.** Effects of sodium azide on a smartDNA assay. The final concentration of the PNA probe, TB01, is 80nM, and of DiSC<sub>2</sub>(3) is 9μM, with 2 ng of *M. tuberculosis* (MTB) genomic DNA. The black bars are initial photobleaching rates in Homopipes buffer, pH 5.0, 10mM, and the white bars are the initial photobleaching rate in the presence of 0.1% sodium azide
